# Supplementary material for: Microbial Signatures Associated with Oropharyngeal and Oral Squamous Cell Carcinomas
Source: PubMed Central journal article supplement (PMC5481414; doi:10.1038/s41598-017-03466-6), 2017-06-22
Supplement: 41598_2017_3466_MOESM1_ESM.pdf [file 41598_2017_3466_MOESM1_ESM.pdf]

**Title: Microbial Signatures Associated with Oropharyngeal and Oral Squamous Cell Carcinomas**

**Sagarika Banerjee, Tian Tian, Zhi Wei, Kristen N Peck, Natalie Shih, Ara A Chalian, Bert W O'Malley Jr, Gregory S Weinstein, Michael D Feldman, James Alwine, Erle S. Robertson**

**Supplemental figure legends.**

**Figure S1.** (Figure S1a-S1f). Probe capture sequencing alignments post MiSeq. The MiSeq reads from individual capture when aligned with the metagenome of PathoChip (Chip probes) was found to cluster mostly at the capture probe regions. The genomic location along with the number of MiSeq reads are mentioned in the figure. The alignment for O capture pool library is shown in Figure S1a; that of B library is shown Figure S1b & S1c; that of F library is shown in Figure S1d; that of P library is shown in Figure S1e & S1f.

Figure S1a

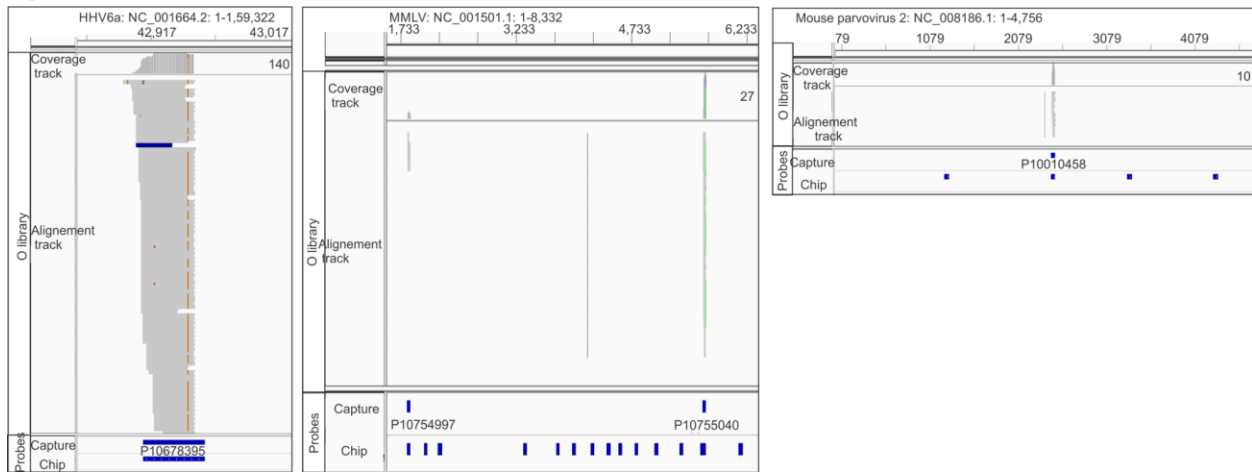

Figure S1b

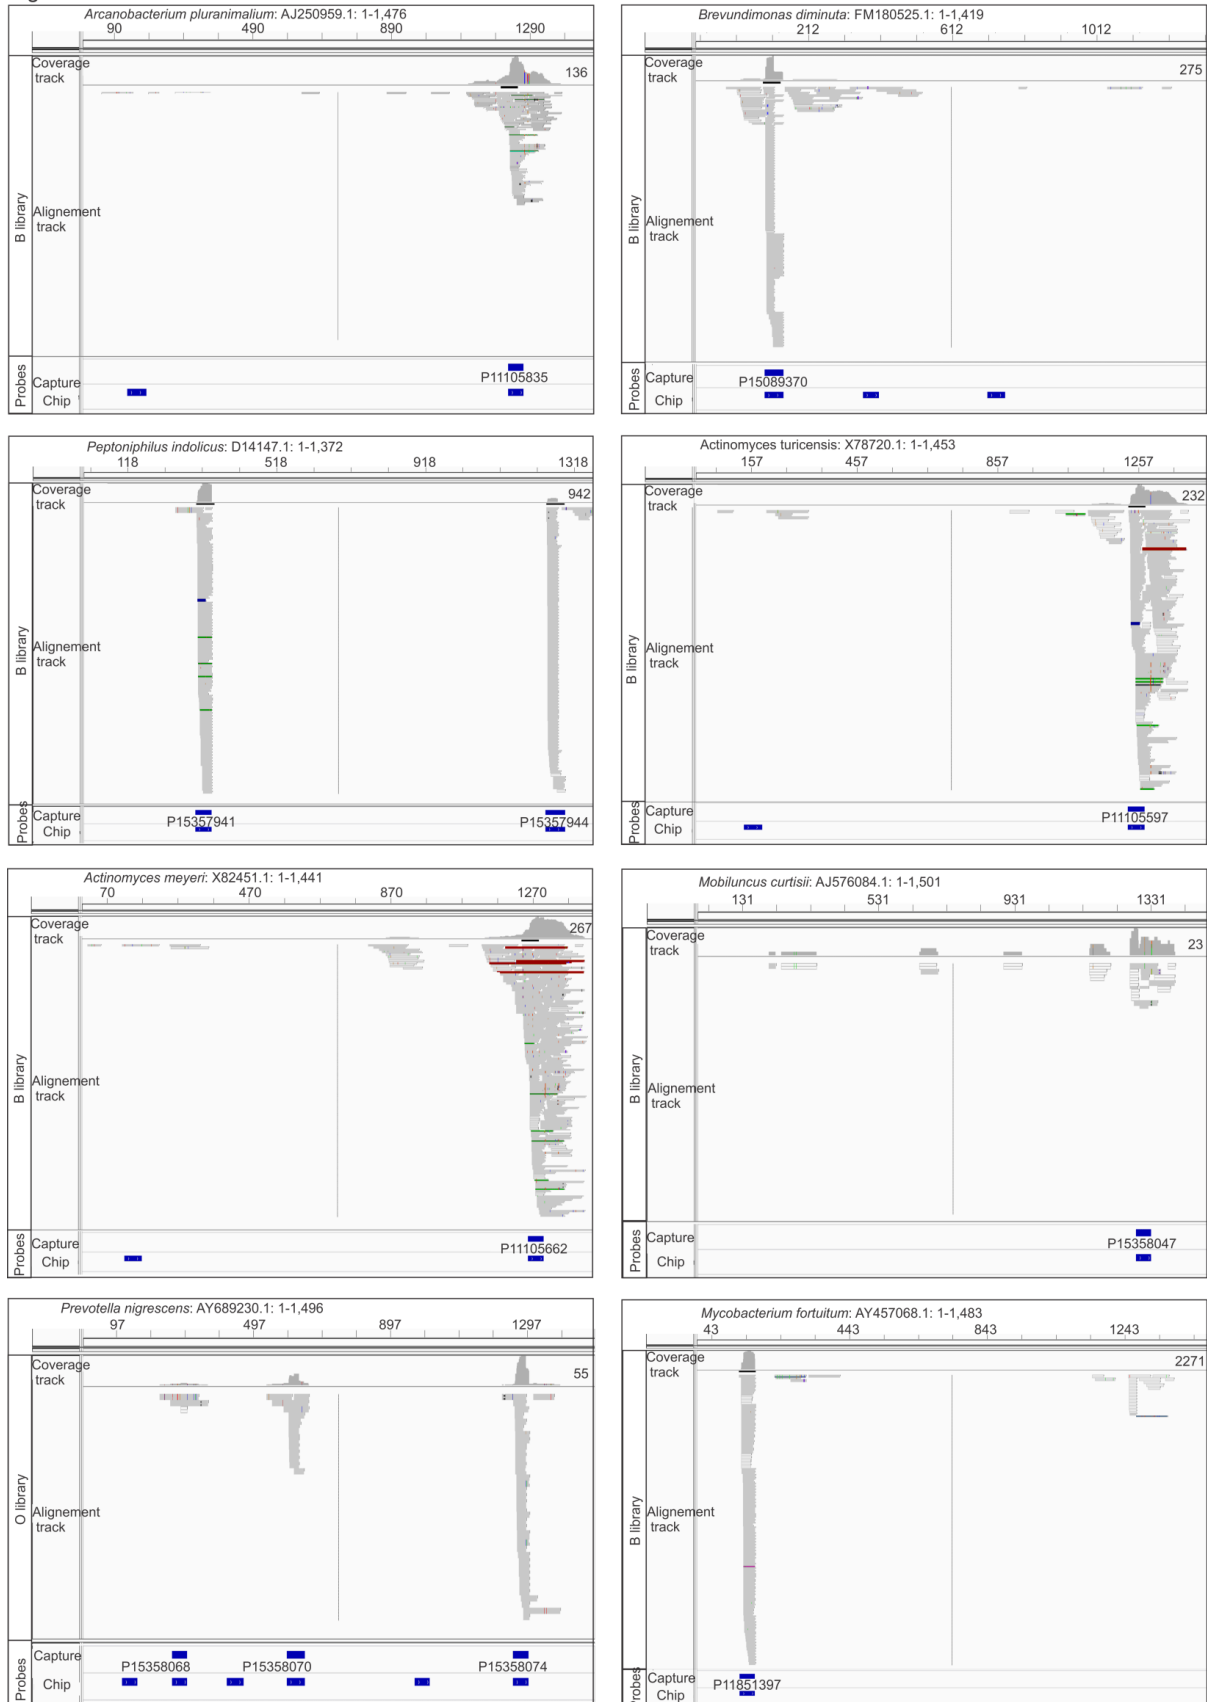

Figure S1c

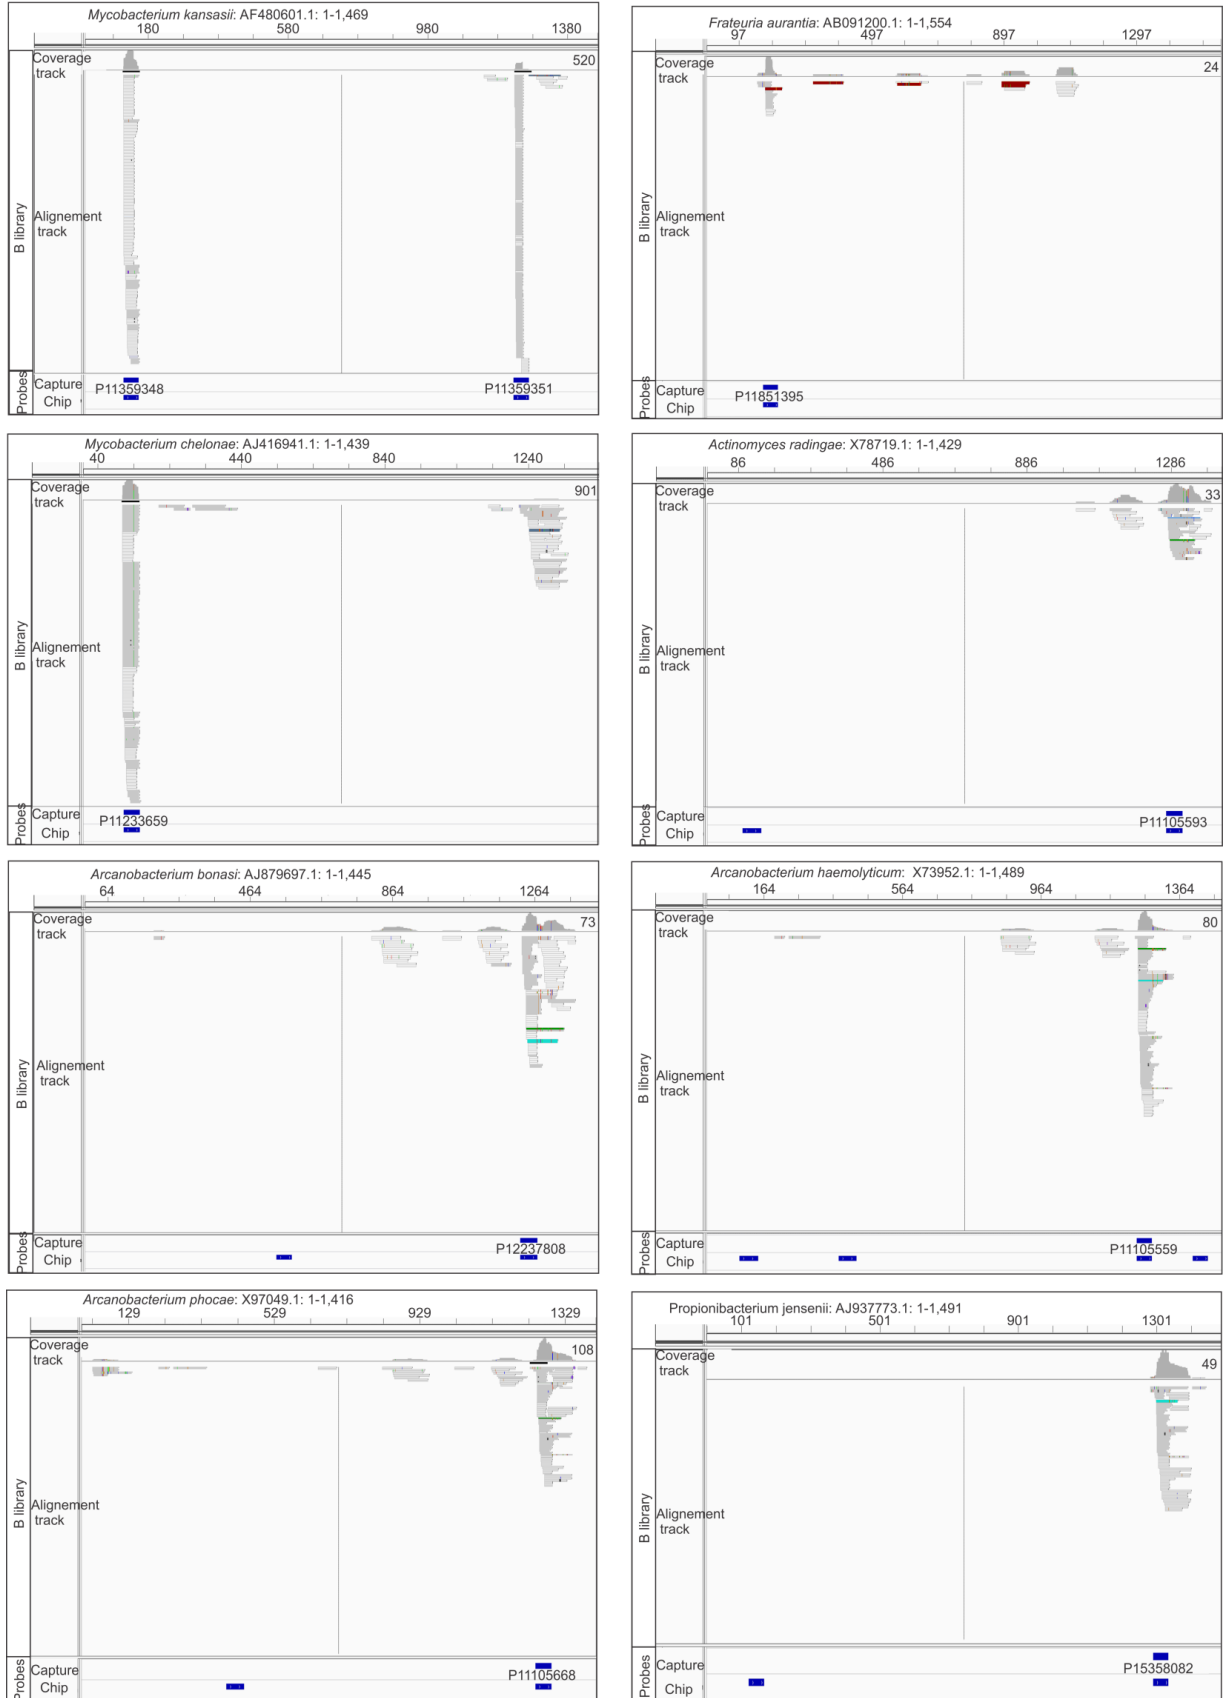

Figure S1d

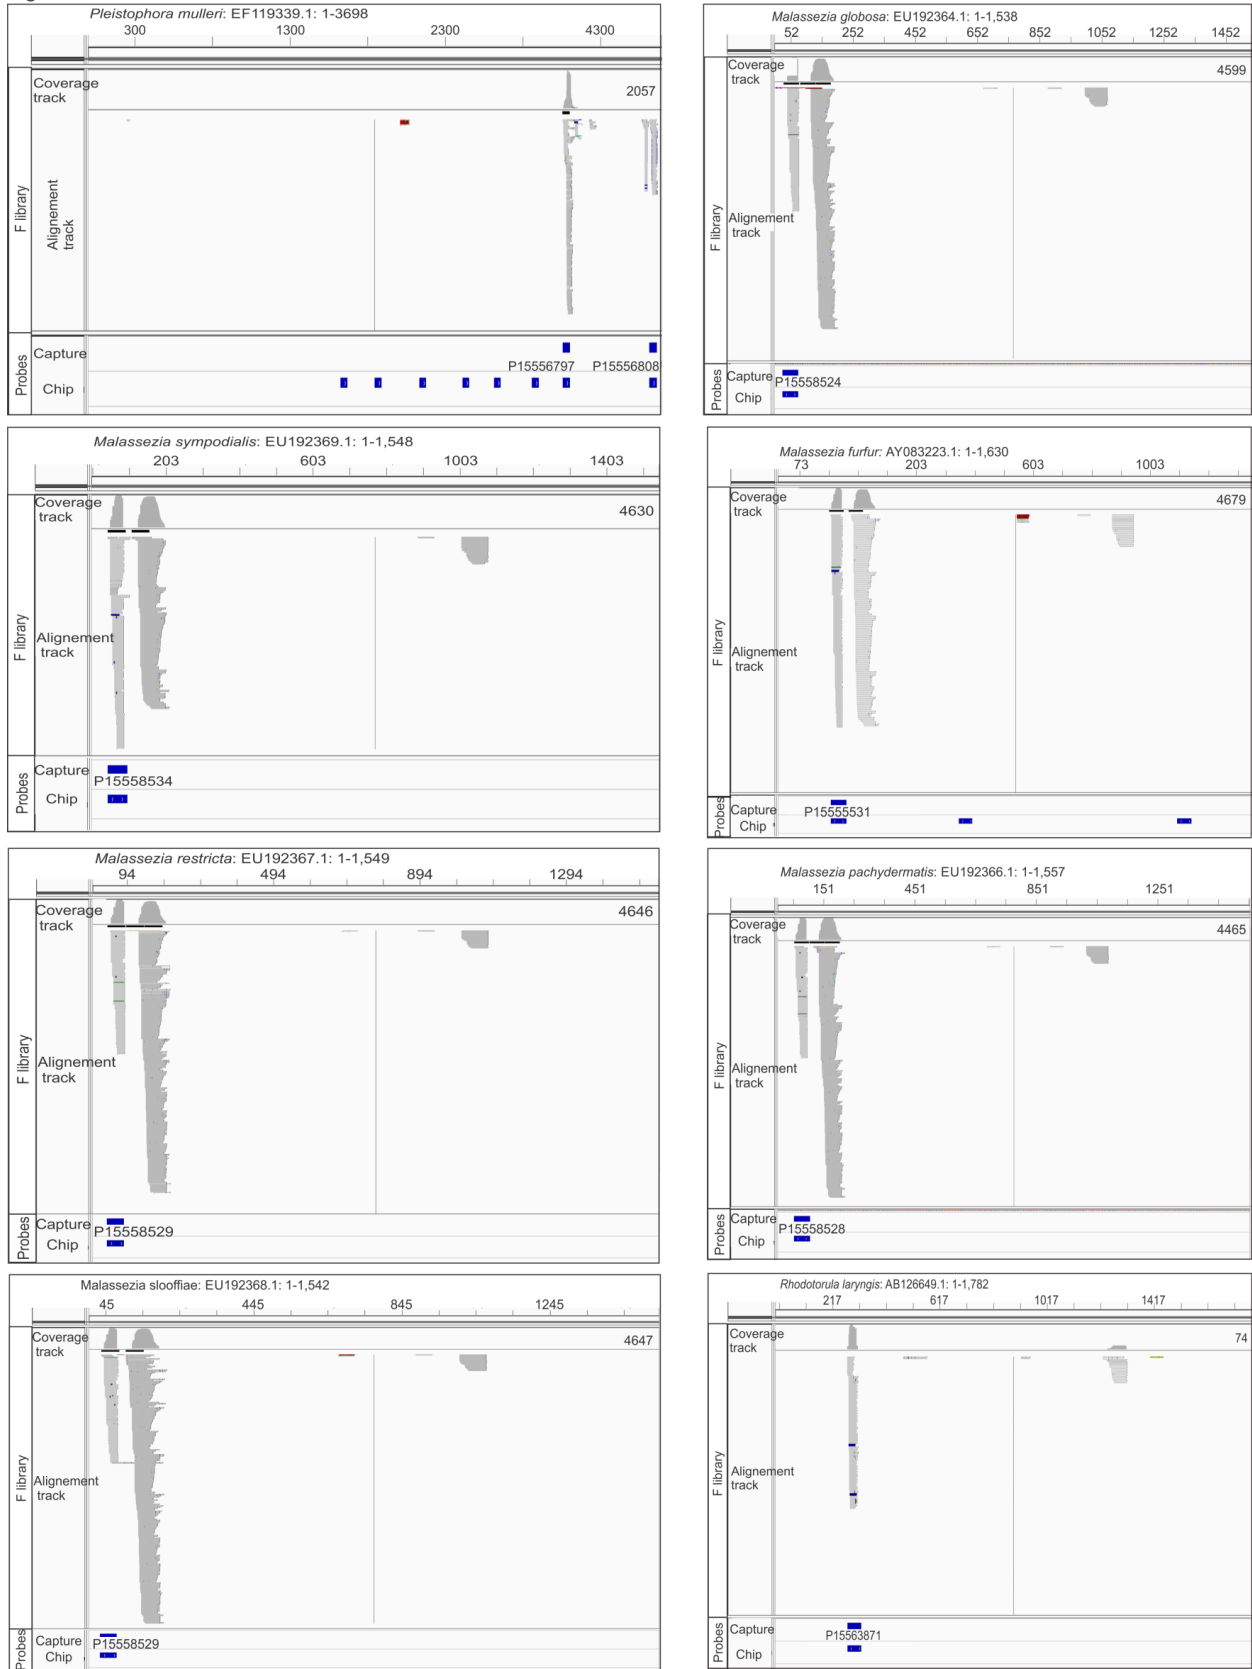

Figure S1e

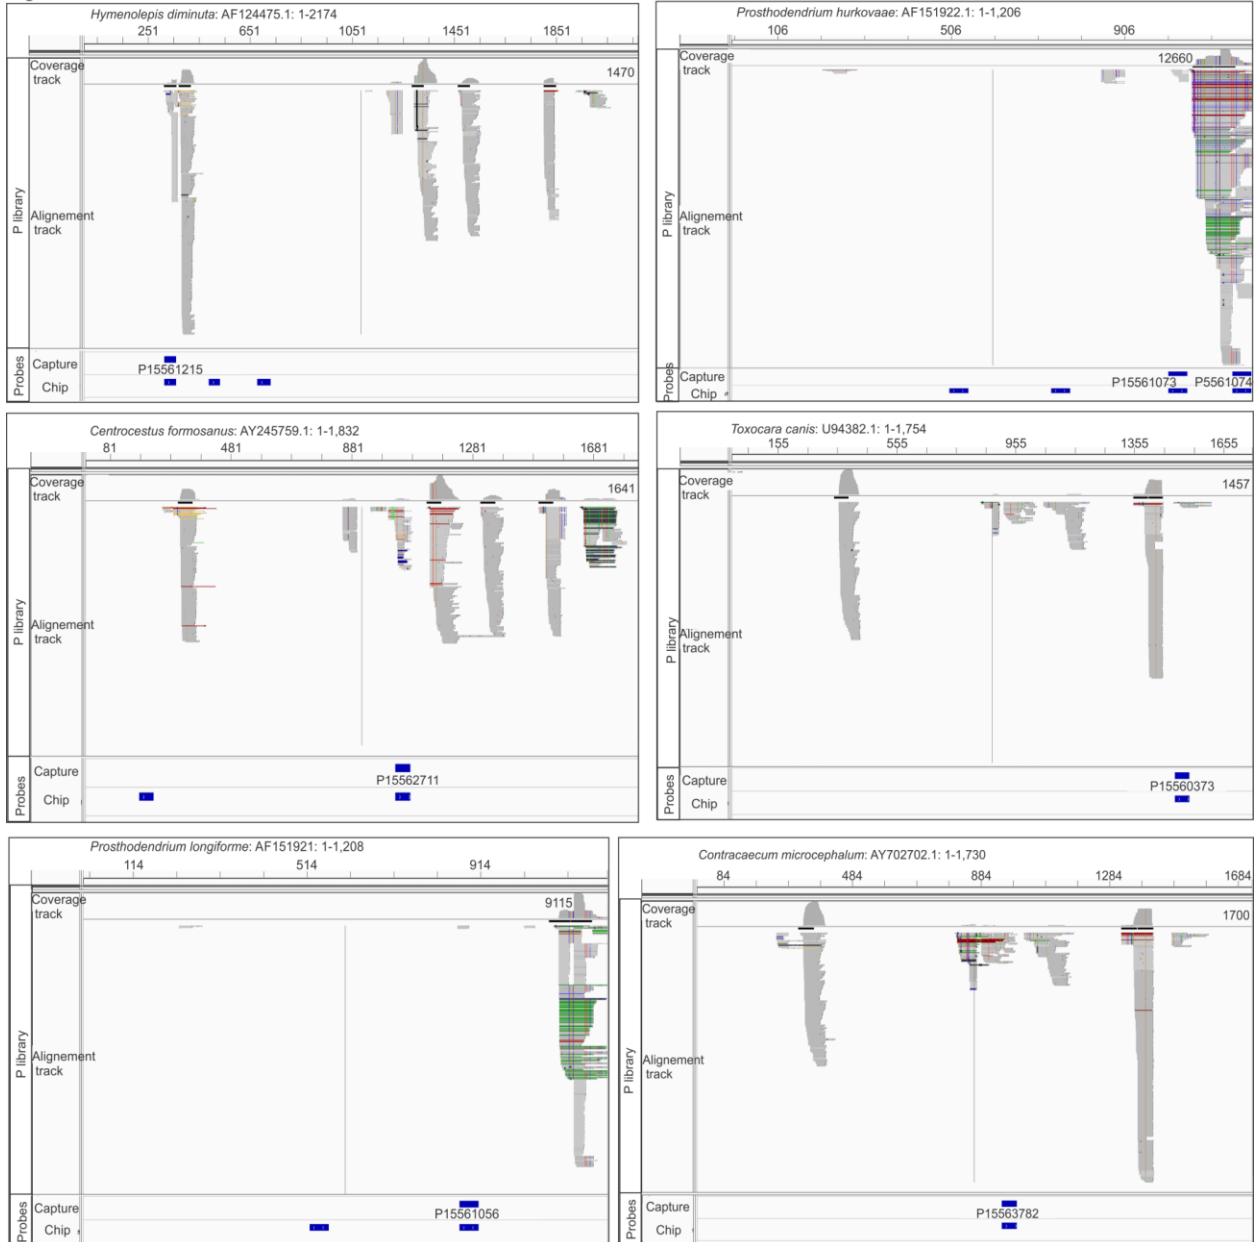

Figure S1f

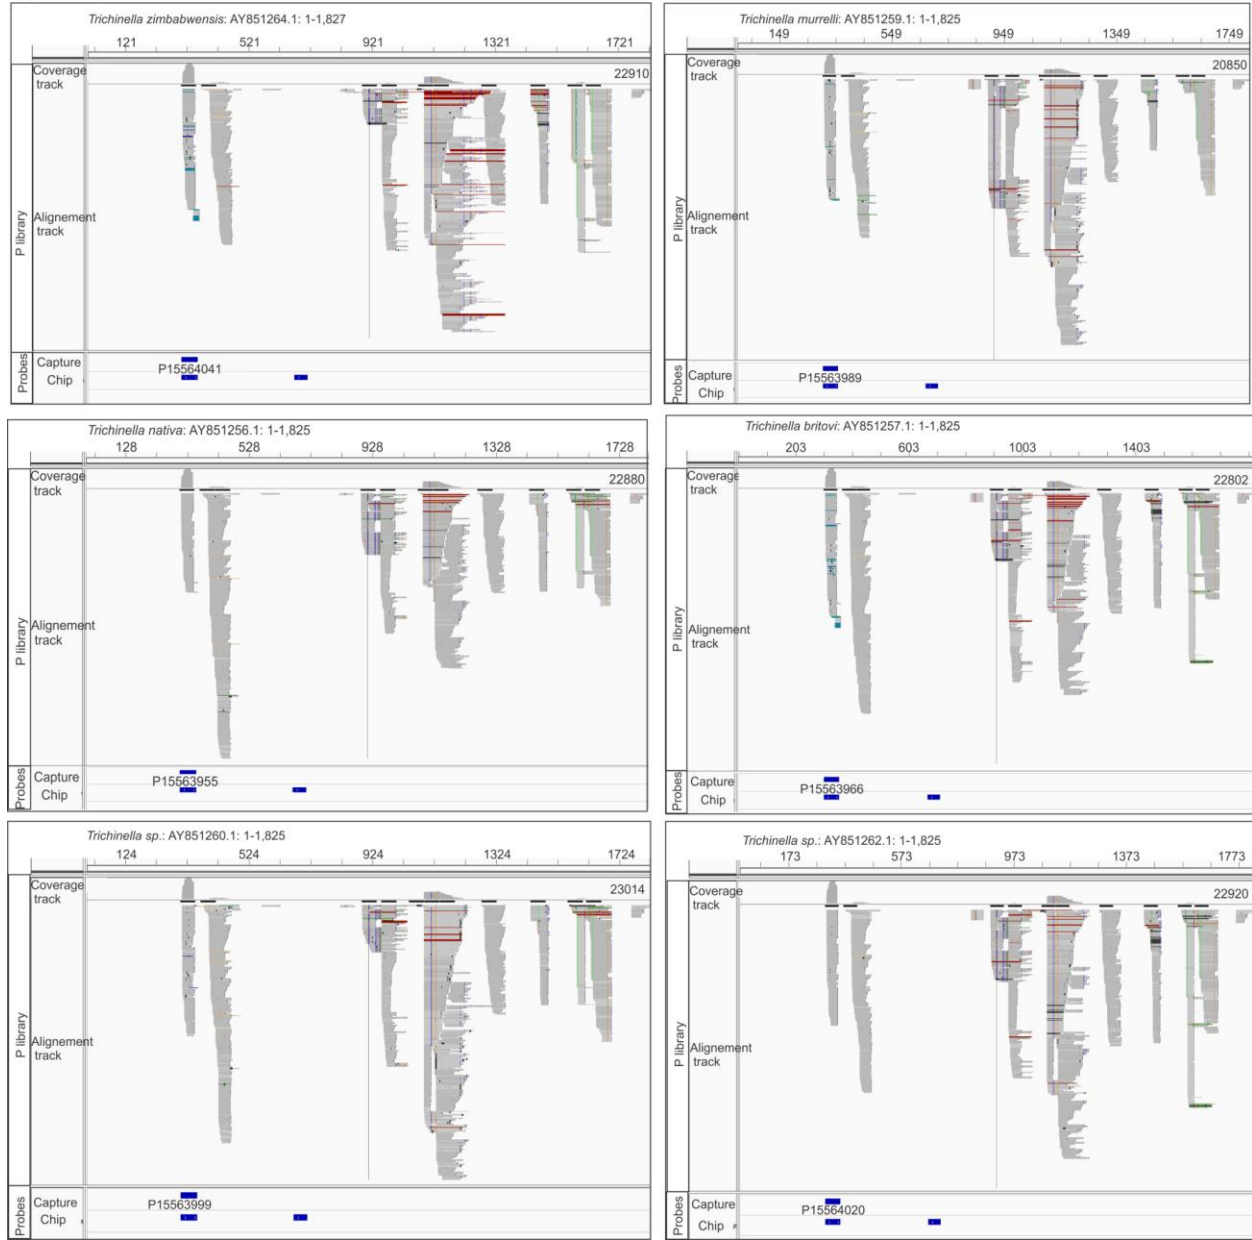

**Figure S2.** Schematic representation of viral, bacterial, fungal and parasitic genomic insertional sites in human chromosomes. The genomic co-ordinates of the pathogens integrated and that of the host chromosome integration sites are mentioned. The co-ordinates for human chromosomes are from GRCh37/hf19 Assembly.

Figure S2

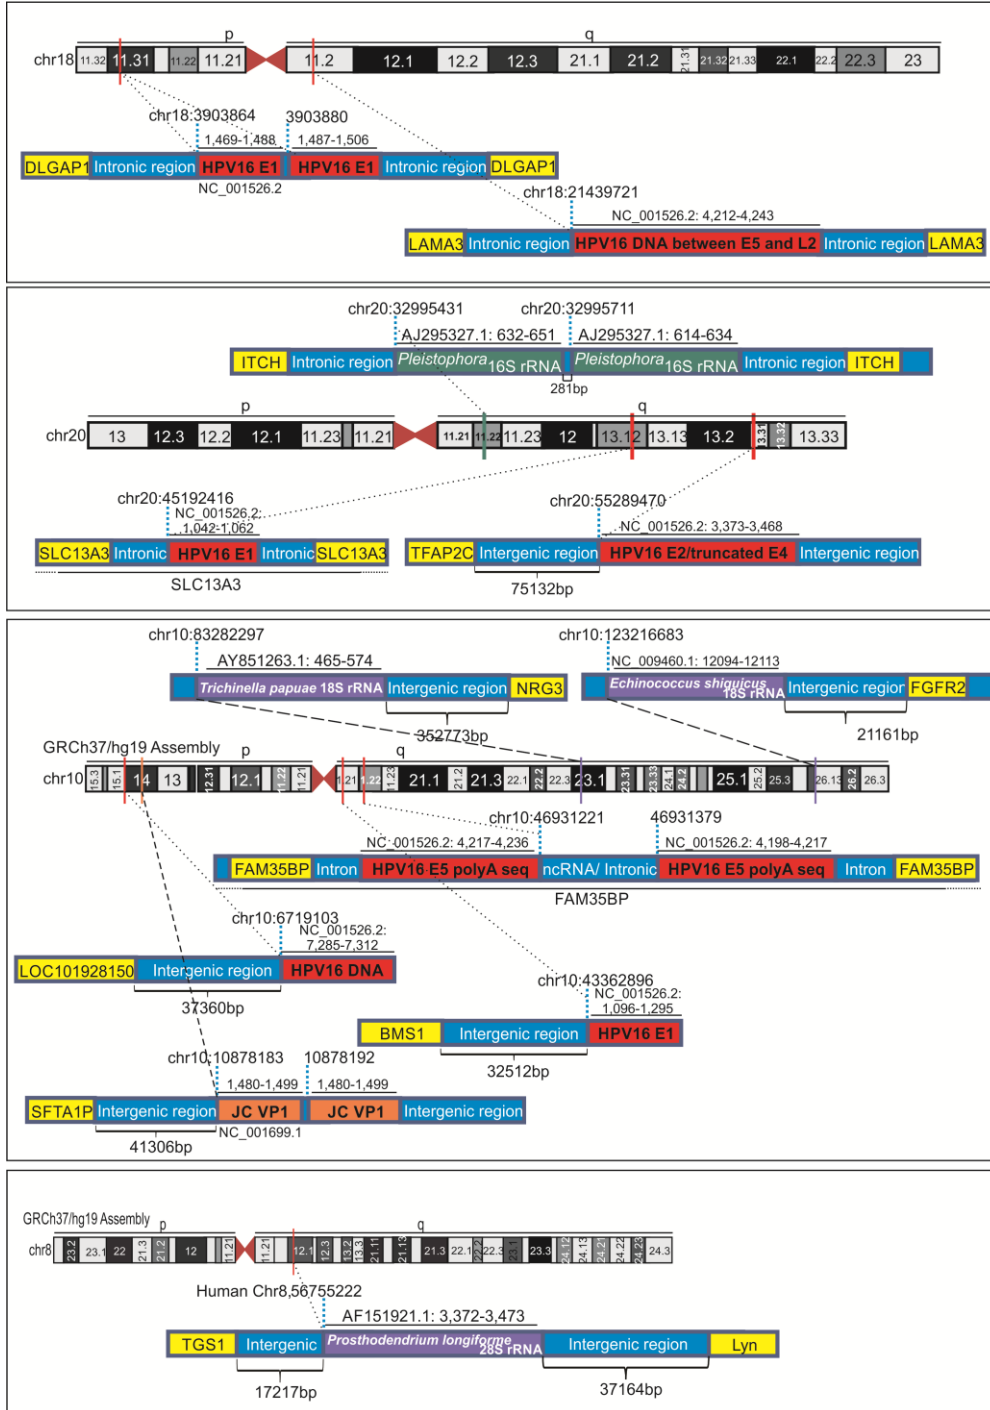

**Title: Microbial Signatures Associated with Oropharyngeal and Oral Squamous Cell Carcinomas**

**Sagarika Banerjee, Tian Tian, Zhi Wei, Kristen N Peck, Natalie Shih, Ara A Chalian, Bert W O'Malley Jr, Gregory S Weinstein, Michael D Feldman, James Alwine, Erle S. Robertson**

**Supplemental table legends.**

**Table S1.** Tumor location and HPV16 positivity status of the OSCC samples screened by PathoChip.

**Table S2.** List of the capture probe sequences used for capture sequencing.

**Table S3.** Microbial signatures detected in OSCC and control samples.

**Table S4.** MiSeq reads aligning to capture probe locations. The total number of MiSeq reads per capture pool for each accessions are mentioned. For example Bcounts for each accession designates the no. of reads in B library that aligned to the particular accession, of which Bcounts.probe designates the no. of reads that aligned to the capture probe location of that particular accession and Bcounts.not.probe designates the no. of reads aligning outside the capture probe region for that particular accession. Reads are mentioned similarly for F, P, O and HPV16 library as well.

**Table S5.** Statistical significance between cluster 1 and cluster 2 oral cancer samples that are clustered by NBClust software. The significant differences between the clusters observed by these methods were determined using two-sided t-test.

**Table S6.** Statistical significance between 'group a', 'group b' and 'un-ungrouped' oral cancer samples that are obtained by topological-based data analyses using Ayasdi software. The significant differences between the clusters observed were determined using two-sided t-test.

**Table S7-S10.** Gene fusion results. List of viral (Table S7), bacterial (Table S8), fungal (Table S9) and parasitic (Table S10) genomic regions integrated either in intronic, exonic, downstream or upstream of certain human genomic regions. Point of integration with genomic co-ordinates, both for the pathogen and human genome are mentioned. The number of reads for such kind of fusion are also mentioned. The description of the gene fusion results are as follows: Column A-H: type of left/right element of fusion fragment (micro-organism or human), left/right chromosome name (pathochip genome or human), left/right start and end co-ordinate. Column I: number of reads supporting fusion; Column J: Gene\_region, indicating region (like intergenic, intronic, exon etc) of the fusion site in human genome; Column K: affected human gene name; Column L: Microbial genomic insertion position in human chromosome; Column M: Number of read support for human sequences; Column N: (Virus/bacteria/parasite/fungus).gene start coordinate of fusion organism in pathochip metagenome; Column O: (Virus/bacteria/parasite/fungus)\_ coordinate of fusion site in pathochip metagenome; Column P: integration site of (Virus/bacteria/parasite/fungus)\_coordinates at their genome; Column Q: (Virus/bacteria/parasite/fungus) region integrated; Column E: Accession number of microorganism integrated (description of accession).



Table S1

| Study Code | Tumor location                                                                                  | Tumor type                      | p16 status |
|------------|-------------------------------------------------------------------------------------------------|---------------------------------|------------|
| ENT01      | tongue/tonsil                                                                                   | Squamous Cell Carcinoma (SCC)   | Positive   |
| ENT02      | tongue/tonsil                                                                                   | SCC                             | Positive   |
| ENT03      | tonsil                                                                                          | SCC                             | Positive   |
| ENT04      | tonsil/base of tongue                                                                           | SCC                             | Positive   |
| ENT05      | tonsil                                                                                          | SCC                             | Positive   |
| ENT06      | tonsil                                                                                          | SCC with sarcomatoid growth     | Positive   |
| ENT07      | tonsil                                                                                          | SCC                             | Positive   |
| ENT08      | tonsil                                                                                          | SCC                             | Positive   |
| ENT09      | tonsil/tongue base                                                                              | SCC                             | Positive   |
| ENT10      | floor of mouth/cheek                                                                            | SCC                             | Negative   |
| ENT11      | tonsil/tongue base                                                                              | SCC                             | Positive   |
| ENT12      | tonsil/tongue base                                                                              | SCC                             | Positive   |
| ENT13      | tonsil                                                                                          | SCC                             | Positive   |
| ENT14      | oropharynx/palatine tonsil                                                                      | SCC                             | Positive   |
| ENT15      | base of tongue                                                                                  | SCC                             | Negative   |
| ENT16      | tongue base                                                                                     | SCC                             | Positive   |
| ENT17      | tonsil/pharynx                                                                                  | SCC                             | Positive   |
| ENT18      | tonsil                                                                                          | SCC                             | Positive   |
| ENT19      | tonsil                                                                                          | SCC                             | Positive   |
| ENT20      | tonsil                                                                                          | SCC                             | Positive   |
| ENT21      | tongue base                                                                                     | SCC                             | Positive   |
| ENT22      | tonsil                                                                                          | SCC                             | Positive   |
| ENT23      | tonsil                                                                                          | SCC                             | Positive   |
| ENT24      | tongue base                                                                                     | SCC                             | Positive   |
| ENT25      | tongue base                                                                                     | SCC                             | Negative   |
| ENT26      | tonsil                                                                                          | SCC                             | Positive   |
| ENT27      | palatine tonsil                                                                                 | SCC                             | Positive   |
| ENT28      | oropharynx/base of tongue including lingual tonsil                                              | SCC                             | Positive   |
| ENT29      | oropharynx                                                                                      | SCC                             | Positive   |
| ENT30      | Retromolar trigone                                                                              | SCC with clear cell change      | Positive   |
| ENT31      | oropharynx/palatine tonsil                                                                      | SCC                             | Positive   |
| ENT32      | tongue/floor of mouth                                                                           | SCC                             | Negative   |
| ENT33      | Tonsil                                                                                          | SCC                             | Positive   |
| ENT34      | tonsil/tongue base                                                                              | SCC                             | Positive   |
| ENT35      | tonsil                                                                                          | Poorly differentiated carcinoma | Positive   |
| ENT36      | retromolar trigone/palate                                                                       | SCC                             | Positive   |
| ENT37      | pharynx                                                                                         | SCC                             | Negative   |
| ENT38      | buccal mucosa                                                                                   | SCC                             | Negative   |
| ENT39      | tonsil                                                                                          | SCC                             | Positive   |
| ENT40      | tonsil                                                                                          | SCC                             | Positive   |
| ENT41      | base of tongue including lingual tonsil                                                         | SCC                             | Positive   |
| ENT42      | tonsil                                                                                          | SCC                             | Positive   |
| ENT43      | tonsil                                                                                          | SCC                             | Positive   |
| ENT44      | oropharynx, base of tongue including lingual tonsil                                             | SCC                             | Positive   |
| ENT45      | oropharynx, palatine tonsil                                                                     | SCC                             | Positive   |
| ENT46      | base of tongue, including lingual tonsil                                                        | SCC                             | Positive   |
| ENT47      | base of tongue including lingual tonsil                                                         | SCC                             | Negative   |
| ENT48      | tongue                                                                                          | SCC                             | Negative   |
| ENT49      | oropharynx/palatine tonsil, base of tongue including lingual tonsil                             | SCC                             | Positive   |
| ENT50      | palatine tonsil, base of tongue including lingual tonsil                                        | SCC                             | Positive   |
| ENT51      | oropharynx/palatine tonsil, base of tongue including lingual tonsil                             | SCC                             | Positive   |
| ENT52      | tonsillar pillar                                                                                | SCC                             | Negative   |
| ENT53      | oropharynx/palatine tonsil, base of tongue including lingual tonsil                             | SCC                             | Positive   |
| ENT54      | tongue/floor of mouth                                                                           | SCC                             | Negative   |
| ENT55      | oropharynx/palatine tonsil                                                                      | SCC                             | Positive   |
| ENT56      | oropharynx/soft palate                                                                          | SCC                             | Positive   |
| ENT57      | tonsil                                                                                          | SCC                             | Positive   |
| ENT58      | oropharynx/base of tongue including lingual tonsil                                              | SCC                             | Positive   |
| ENT59      | oropharynx/base of tongue including lingual tonsil                                              | SCC                             | Positive   |
| ENT60      | oropharynx/palatine tonsil, base of tongue including lingual tonsil/pharyngeal wall (posterior) | SCC                             | Positive   |
| ENT61      | tonsil                                                                                          | SCC                             | Positive   |
| ENT62      | base of tongue including lingual tonsil                                                         | SCC                             | Positive   |
| ENT63      | oropharynx base of tongue, including lingual tonsil                                             | SCC                             | Positive   |
| ENT64      | oropharynx base of tongue, including lingual tonsil                                             | SCC                             | Positive   |
| ENT65      | oropharynx base of tongue, including lingual tonsil                                             | SCC                             | Positive   |
| ENT66      | palatine tonsil                                                                                 | SCC                             | Positive   |
| ENT67      | oropharynx palatine tonsil base of tongue, including lingual tonsil                             | SCC                             | Positive   |
| ENT68      | tonsil, base of tongue                                                                          | SCC                             | Positive   |
| ENT69      | hard palate                                                                                     | SCC                             | Positive   |
| ENT70      | tonsil                                                                                          | SCC                             | Positive   |
| ENT71      | tonsil                                                                                          | SCC                             | Positive   |
| ENT72      | tongue base                                                                                     | SCC                             | Positive   |
| ENT73      | tonsil, tongue base                                                                             | SCC                             | Negative   |
| ENT74      | tonsil and tongue base                                                                          | SCC                             | Positive   |
| ENT75      | tonsil                                                                                          | SCC                             | Positive   |
| ENT76      | oropharynx base of tongue, including lingual tonsil, pharyngeal wall (posterior)                | SCC                             | Positive   |
| ENT77      | tonsil, tongue base, pharynx                                                                    | SCC                             | Positive   |
| ENT78      | oropharynx palatine tonsil                                                                      | SCC                             | Positive   |
| ENT79      | tonsil/tongue base                                                                              | SCC                             | NA         |
| ENT80      | tongue base                                                                                     | SCC                             | NA         |
| ENT81      | tonsil/base of tongue                                                                           | SCC                             | NA         |
| ENT82      | tongue base                                                                                     | SCC                             | Positive   |
| ENT83      | tonsil                                                                                          | SCC                             | Positive   |
| ENT84      | buccal mucosa                                                                                   | SCC                             | NA         |
| ENT85      | tongue                                                                                          | SCC                             | Negative   |
| ENT86      | oropharynx, tonsil                                                                              | SCC                             | Positive   |
| ENT87      | oropharynx, tongue base                                                                         | SCC                             | Positive   |
| ENT88      | tonsil/tongue base                                                                              | SCC                             | Positive   |
| ENT89      | tonsil                                                                                          | SCC                             | Positive   |
| ENT90      | tonsillar pillar                                                                                | SCC                             | Positive   |
| ENT91      | tongue base                                                                                     | SCC                             | Positive   |
| ENT92      | tongue base                                                                                     | SCC                             | Positive   |
| ENT93      | tonsil                                                                                          | SCC                             | Positive   |
| ENT94      | tonsil                                                                                          | SCC                             | NA         |
| ENT95      | left cheek and lip resection                                                                    | SCC                             | NA         |
| ENT96      | Left radical tonsillectomy, tongue base resection                                               | SCC                             | Positive   |
| ENT97      | Tongue, right                                                                                   | SCC                             | NA         |
| ENT98      | Left radical tonsillectomy, tongue base resection, limited pharyngectomy                        | SCC                             | Positive   |
| ENT99      | Left tonsil, left radical tonsillectomy, tongue base resection, limited pharyngectomy           | SCC                             | Positive   |
| ENT100     | Right tonsillectomy, tongue base resection                                                      | SCC                             | NA         |

Table S2. Microbial signatures detected in OSCC and control samples.

|                      | Cancer                 | MC                      | NC                     | Cancer/MC              | Cancer/NC                 | Cancer/MC/NC            | NC/MC                   |
|----------------------|------------------------|-------------------------|------------------------|------------------------|---------------------------|-------------------------|-------------------------|
| Viral signatures     | <b>HPV16</b>           | Coronaviridae           | Togaviridae            |                        |                           | Papillomaviridae        | Adenoviridae            |
|                      |                        |                         |                        |                        |                           | Poxviridae              | Picornaviridae          |
|                      |                        |                         |                        |                        |                           | Retroviridae            | Flaviviridae            |
|                      |                        |                         |                        |                        |                           | Polyomaviridae          | Hepadnaviridae          |
|                      |                        |                         |                        |                        |                           | Herpesviridae           | Parvoviridae            |
|                      |                        |                         |                        |                        |                           | Reoviridae              | Anelloviridae           |
|                      |                        |                         |                        |                        |                           | Orthomyxoviridae        |                         |
| Bacterial signatures | <i>Eshcherichia</i>    | <i>Campylobacter</i>    | <i>Porphyromonas</i>   | <i>Arcanobacterium</i> | <i>Mobiluncus</i>         | <i>Mycobacterium</i>    |                         |
|                      | <i>Rothia</i>          | <i>Streptobacillus</i>  |                        | <i>Actinomyces</i>     | <i>Propionibacterium</i>  | <i>Sphingobacterium</i> |                         |
|                      | <i>Peptoniphilus</i>   |                         |                        | <i>Aeromonas</i>       | <i>Prevotella</i>         | <i>Streptococcus</i>    |                         |
|                      | <i>Brevundimonas</i>   |                         |                        | <i>Bordetella</i>      | <i>Citrobacter</i>        |                         |                         |
|                      | <i>Comamonas</i>       |                         |                        | <i>Aerococcus</i>      | <i>Sphingomonas</i>       |                         |                         |
|                      | <i>Alcaligenes</i>     |                         |                        | <i>Pediococcus</i>     | <i>Peptostreptococcus</i> |                         |                         |
|                      | <i>Caulobacter</i>     |                         |                        | <i>Acinetobacter</i>   |                           |                         |                         |
|                      | <i>Cardiobacterium</i> |                         |                        | <i>Actinobacillus</i>  |                           |                         |                         |
|                      | <i>Plesiomonas</i>     |                         |                        | <i>Veillonella</i>     |                           |                         |                         |
|                      | <i>Serratia</i>        |                         |                        |                        |                           |                         |                         |
|                      | <i>Edwardsiella</i>    |                         |                        |                        |                           |                         |                         |
|                      | <i>Haemophilus</i>     |                         |                        |                        |                           |                         |                         |
| <i>Frateuria</i>     |                        |                         |                        |                        |                           |                         |                         |
| Fungal signatures    | <i>Rhodotorula</i>     | <i>Pseudallescheria</i> | <i>Piedraia</i>        | <i>Fonsecaea</i>       |                           | <i>Malassezia</i>       | <i>Microsporium</i>     |
|                      | <i>Geotrichum</i>      |                         | <i>Trichosporon</i>    |                        |                           | <i>Pleistophora</i>     | <i>Alternaria</i>       |
|                      | <i>Pneumocystis</i>    |                         | <i>Encephalitozoon</i> |                        |                           | <i>Absidia</i>          |                         |
|                      |                        |                         | <i>Trichophyton</i>    |                        |                           | <i>Phialophora</i>      |                         |
|                      |                        |                         | <i>Paecilomyces</i>    |                        |                           | <i>Cladophialophora</i> |                         |
|                      |                        | <i>Madurella</i>        |                        |                        | <i>Cladosporium</i>       |                         |                         |
| Parasitic signatures | <i>Hymenolepis</i>     | <i>Echinococcus</i>     | <i>Dipylidium</i>      |                        | <i>Prosthodendrium</i>    | <i>Toxocara</i>         | <i>Diphyllobothrium</i> |
|                      | <i>Centrocestus</i>    |                         | <i>Anisakis</i>        |                        | <i>Contracaecum</i>       |                         | <i>Strongyloides</i>    |
|                      | <i>Trichinella</i>     |                         | <i>Echinostoma</i>     |                        |                           |                         |                         |

Table S3

| Capture Probe Library                        | Microorganisms                                      | Probe sequences used for capture 5'-3'                             |                                                          |
|----------------------------------------------|-----------------------------------------------------|--------------------------------------------------------------------|----------------------------------------------------------|
| B (Bacterial pool)                           | A250959.1  <i>Arcanobacterium</i> sp.               | /5Biosg/GAATCCCTTAAAGCCAGTCTCAGTTCGGATTGGGGTCTGCAACTC              |                                                          |
|                                              | X73952.1  <i>Arcanobacterium haemolyticum</i>       | /5Biosg/GAATCCCTTAAAGCCAGTCTCAGTTCGGATTGGGGTCTGCAACTC              |                                                          |
|                                              | X97049.1  <i>Arcanobacterium phocae</i>             | /5Biosg/GAATCCCTTAAAGCCAGTCTCAGTTCGGATTGGGGTCTGCAACTC              |                                                          |
|                                              | A879697.1  <i>Arcanobacterium</i> sp.               | /5Biosg/CTAATCACTTAAAGTCTGCTCAGTTCGGATTGGGGTCTGCAACTCGAC           |                                                          |
|                                              | AJ576084.1  <i>Mobiluncus curtisii</i>              | /5Biosg/CAACTCGACCCCATGAAGTTGGAGTCGTAGTAAATCGAGATCAG               |                                                          |
|                                              | J01859.1  <i>Escherichia coli</i>                   | /5Biosg/TAAACTCAATGAATTGACGGGGCCGCCACAAGCGGTGGAGCATGTGGTTTAAATTCGA |                                                          |
|                                              | X78719.1  <i>Actinomyces radingae</i>               | /5Biosg/ATCGGGTCTGCAACTCGACCTCGTGAAGGTGGAGTCTGAGTAAAT              |                                                          |
|                                              | X78720.1  <i>Actinomyces turicensis</i>             | /5Biosg/ATATCGTAAGGTGGAGCGAATCACTTAAAGCCAGTCTCAGTTCGGATTG          |                                                          |
|                                              | X82451.1  <i>Actinomyces meyeri</i>                 | /5Biosg/GAATCCCTTAAAGCCAGTCTCAGTTCGGATTGGGGTCTGCAACTC              |                                                          |
|                                              | AJ171364.1  <i>Rothia dentocariosa</i>              | /5Biosg/CTAATCCCTAAAGCCGGTCTCAGTTCGGATTGGGGTCTGCAACT               |                                                          |
|                                              | AJ937773.1  <i>Propionibacterium jensenii</i>       | /5Biosg/GAATCTCAAAAAGCCAGTCTCAGTTCGGATTGGGGTCTGCAACTC              |                                                          |
|                                              | D14147.1  <i>Peptoniphilus indolicus</i>            | /5Biosg/CCTGAGAGGGTGAACGGCCACATTTGAACTGAGAAACGGTCCAAA              |                                                          |
|                                              | D14147.1  <i>Peptoniphilus indolicus</i>            | /5Biosg/GATAGCAAGCAATCTCAAAAAGCCTATCTCAGTTCGGATTGTTCTGCAACT        |                                                          |
|                                              | AF480601.1  <i>Mycobacterium kansasii</i>           | /5Biosg/CGGGATAAGCCTGGGAACTGGGTCTAATACCGGATAGGACCACT               |                                                          |
|                                              | AF480601.1  <i>Mycobacterium kansasii</i>           | /5Biosg/CGAGGTTAAGCGAATCTCTTTAAAGCCGGTCTCAGTTCGGATCGG              |                                                          |
|                                              | AJ416941.1  <i>Mycobacterium chelonae</i>           | /5Biosg/ATAAGCCTGGGAACTGGGTCTAATACCGGATAGGACCACACTT                |                                                          |
|                                              | AY457068.1  <i>Mycobacterium fortuitum</i>          | /5Biosg/CACITTTGGGATAAGCCTGGGAACTGGGTCTAATACCGAATAGGAC             |                                                          |
|                                              | FM180525.1  <i>Brevundimonas diminuta</i>           | /5Biosg/GAGTTGCAGAGGACAATCCGAATGAGACAATTTTAAAGATTAAACCTCTGTAG      |                                                          |
|                                              | F (Fungal pool)                                     | AB091200.1  <i>Frateuria aurantia</i>                              | /5Biosg/GAACTTACGCTAATACCCATACGCTACGGGAGAAGCAGG          |
|                                              |                                                     | AB126649.1  <i>Rhodotorula laryngis</i>                            | /5Biosg/CTTCATTCAAATACCTGCCCTATCAACTTTCGATGGTAGAGGCCCTAC |
| DQ325447.1  <i>Geotrichum citri-aurantii</i> |                                                     | /5Biosg/AGAGCTTTCATGATTTTGTGGTGGTGGTGCATGGCCGTCTTCTAGTGTGGAGTGT    |                                                          |
| EU192364.1  <i>Malassezia globosa</i>        |                                                     | /5Biosg/GTCTGGCGATCTCTCAAATATCGCCCTATCAACTCTCACTGTCGATGGATG        |                                                          |
| AY083223.1  <i>Malassezia furfur</i>         |                                                     | /5Biosg/TTTCATTCAAATATCGCCCTATCAACTCTGATGGTAGGATAGAGCCCTACCAT      |                                                          |
| EU192366.1  <i>Malassezia pachydermatis</i>  |                                                     | /5Biosg/ATGCTTCATTCAAATATCGCCCTATCAACTCTGATGGTAGGATAGAGGCCCTA      |                                                          |
| EU192367.1  <i>Malassezia restricta</i>      |                                                     | /5Biosg/CTGGCGGTCTCTCAAATATCGCCCTATCAACTCTCACTGTCGATGGATG          |                                                          |
| EU192368.1  <i>Malassezia slooffiae</i>      |                                                     | /5Biosg/CGGGGTGCTTCATTCAAATATCGCCCTATCAACTCTGATGGTAG               |                                                          |
| EU192369.1  <i>Malassezia symyodialis</i>    |                                                     | /5Biosg/ATGCTTCATTCAAATATCGCCCTATCAACTCTGATGGTAGGATAGAGGCCCTA      |                                                          |
| EF119339.1  <i>Pleistophora mulleri</i>      |                                                     | /5Biosg/GAGGAAATCACTGTAAAGCAGCGGTTAACGGCGGAGTAACATGACT             |                                                          |
| EF119339.1  <i>Pleistophora mulleri</i>      |                                                     | /5Biosg/GCAGAAAGCGACGGTCTTTTGTATTCTCGATTCGACTCTCTATCATG            |                                                          |
| AF044392.1  <i>Pleistophora ehrenbaumi</i>   |                                                     | /5Biosg/AAAGCACAGGAAGGAGGGTCAAGAAACAGTCACTGATGCCCTAG               |                                                          |
| P (Parasitic pool)                           | AB266392.1  <i>Pneumocystis jirovecii</i>           | /5Biosg/CTGTGCTGGCGATGGTTCATTCAAATATCGCCCTATCAACTCTGATG            |                                                          |
|                                              | AF124475.1  <i>Hymenolepis diminuta</i>             | /5Biosg/CTTCAAATGTCTGCCCTATCAACTTTCGATGGTAGGTCACCTGCCCTAC          |                                                          |
|                                              | AY245759.1  <i>Centrocestus formosanus</i>          | /5Biosg/AAAGTCAGAGGTTGCAAGAGCAGTCACTCCGCTAGTTCGACCAATAAC           |                                                          |
|                                              | AF151921.1  <i>Prosthodendrium longiforme</i>       | /5Biosg/GTCTTGAACACCGGACCAAGGAGAGTAACATGCGCGCAGTCACT               |                                                          |
|                                              | AF151922.1  <i>Prosthodendrium hurkovaee</i>        | /5Biosg/GAGCGGTAGGCGCATCACCGCCCGTCCATGACAATTGTTCTTG                |                                                          |
|                                              | AF151922.1  <i>Prosthodendrium hurkovaee</i>        | /5Biosg/CCGAAGCGGTTCTGACGTGCAAACTGATCGCCAGACATGAGTATA              |                                                          |
|                                              | AY851256.1  <i>Trichinella nativa</i>               | /5Biosg/ACATCACTTTCAAGTGTCTGCCCTATCAACTCTCGATGGTAGTCTATGCGACTA     |                                                          |
|                                              | AY851257.1  <i>Trichinella britovi</i>              | /5Biosg/ACATCACTTTCAAGTGTCTGCCCTATCAACTCTCGATGGTAGTCTATGCGACTA     |                                                          |
|                                              | AY851259.1  <i>Trichinella murrelli</i>             | /5Biosg/ACATCACTTTCAAGTGTCTGCCCTATCAACTCTCGATGGTAGTCTATGCGACTA     |                                                          |
|                                              | AY851260.1  <i>Trichinella</i> sp.                  | /5Biosg/ACATCACTTTCAAGTGTCTGCCCTATCAACTCTCGATGGTAGTCTATGCGACTA     |                                                          |
|                                              | AY851262.1  <i>Trichinella</i> sp.                  | /5Biosg/ACATCACTTTCAAGTGTCTGCCCTATCAACTCTCGATGGTAGTCTATGCGACTA     |                                                          |
|                                              | AY851263.1  <i>Trichinella papuae</i>               | /5Biosg/ACATCACTTTCAAGTGTCTGCCCTATCAACTCTCGATGGTAGTCTATGCGACTA     |                                                          |
| O (Other pool)                               | AY851264.1  <i>Trichinella zimbabwensis</i>         | /5Biosg/ACATCACTTTCAAGTGTCTGCCCTATCAACTCTCGATGGTAGTCTATGCGACTA     |                                                          |
|                                              | AY702702.1  <i>Contraecaecum microcephalum</i>      | /5Biosg/GATCAGATACCCCTAGTTCGACCGTAACACGATCAACCACTAGCGTT            |                                                          |
|                                              | U94382.1  <i>Toxocara canis</i>                     | /5Biosg/TAACCCGTTGAAATCCTCGTGTGCGGATCGGGAATGCAATTAATTT             |                                                          |
|                                              | NC_008186.1  Mouse parvovirus 2                     | /5Biosg/AAAGACGCTTAAAGACTGGGGAGGCAAGGTTGGTCACTCTTTTAGAA            |                                                          |
|                                              | NC_001664.2  Human herpesvirus 6A                   | /5Biosg/TATAGCAGCGCCGATGCCAACCGCAGAGGTTGATCAGTACATAGAT             |                                                          |
|                                              | NC_001664.2  Human herpesvirus 6A                   | /5Biosg/CAATACAGAGTGTGTTTGGCAAATTTAAGCAGCAATTTGTTGATCTAAATTAAGG    |                                                          |
|                                              | NC_006879.1  Simian adenovirus 1                    | /5Biosg/TCTTGATCAGTCTTCCACCGGAACTCTGCTTCCCTGTCT                    |                                                          |
|                                              | NC_006879.1  Simian adenovirus 1                    | /5Biosg/AGAGGCCAGAGAGGAGCAACTGGCAAAGCAGCTGAACAGCATC                |                                                          |
|                                              | NC_002657.1  Classical swine fever virus            | /5Biosg/ATTGGGGAACAAGCCAGAGAAAGGGGGAGATTGGGAGAGTAAAG               |                                                          |
|                                              | NC_001699.1  JC polyomavirus                        | /5Biosg/TAACAGCCAGTAAACAAAGCACAAGGGGAAGTGGAAAGCAGCCAA              |                                                          |
|                                              | NC_001699.1  JC polyomavirus                        | /5Biosg/AAAGGGAGGGAACCTATATTTCTTTGGCCACTCATACCCAAAGTATAGATGATG     |                                                          |
|                                              | NC_001699.1  JC polyomavirus                        | /5Biosg/TTATAGGGGTGACAAGTTTGTATGATGTGCACTCTAATGGGCAAGCACTCAT       |                                                          |
| HPV16 pool                                   | NC_001664.2  Human herpesvirus 6A                   | /5Biosg/CTAAAACCGTCTTGCCTCTCAAATCTTTAATGAGAAAAACGTTACGGGGTAAAC     |                                                          |
|                                              | NC_001664.2  Human herpesvirus 6A                   | /5Biosg/ACATTAATACAGGCAAGGACACAATTCACGGCATTCTTGAAGCCGTGAC          |                                                          |
|                                              | NC_001664.2  Human herpesvirus 6A                   | /5Biosg/CTATCAGAATTACGAACGCCCGATAAACTAATCCGCGCATCAAAATTAAT         |                                                          |
|                                              | NC_001664.2  Human herpesvirus 6A                   | /5Biosg/AAACTTACTCATGTTTCTGCAGTCTCACTTTCGAAGACATTCAGTTCACG         |                                                          |
|                                              | NC_001664.2  Human herpesvirus 6A                   | /5Biosg/AAGTGGTAACTTAAATCGGAGTGGTGTGTCGGCGTGGTGAATTTT              |                                                          |
|                                              | NC_001664.2  Human herpesvirus 6A                   | /5Biosg/CGATGACCGCTAAATTTGATAAATGATCTGCTCCACTCCGATTCAAAGAAA        |                                                          |
|                                              | NC_001664.2  Human herpesvirus 6A                   | /5Biosg/TTAGCAATTTTAAAGTTTCTAACCCGCTGGGTAGGAAAGACCTCAACCAC         |                                                          |
|                                              | NC_001501.1  Moloney murine leukemia virus          | /5Biosg/GATAGACAGGAGGAGAACGAAGGAGTCCCAACTCGATCGCGAC                |                                                          |
|                                              | NC_001501.1  Moloney murine leukemia virus          | /5Biosg/GTAAACCAATGGAGATCGGGAGACGGTATGGGCAACTCTGGCAAC              |                                                          |
|                                              | NC_014480.2  Torque teno virus 2                    | /5Biosg/AAAACACAGAATCACAGTCAGAATAGGAGCCCTAAACCTTTGAGGACAAG         |                                                          |
|                                              | NC_014480.2  Torque teno virus 2                    | /5Biosg/GAGACAGGAGACAGCCATAAACACCAACGCTAGACTGACACTAATATGC          |                                                          |
|                                              | NC_001583.1  Human papillomavirus type 26           | /5Biosg/CCTATGATGTTATTAATGTGCCAGAAACCAATTAATTAAGCAACCAAAATTCGG     |                                                          |
| HPV16 pool                                   | NC_001583.1  Human papillomavirus type 26           | /5Biosg/TGTTGCAATGGGCGTTCGATCATGACATAACAGATGATAGTGAATTTGCAATATG    |                                                          |
|                                              | NC_015961.1  Tomato chlorotic leaf distortion virus | /5Biosg/TATGGCTCTCTCTCTGTCACCTGGCCGATTATAGACCATGGTCTAAATAA         |                                                          |
|                                              | NC_010729.1  <i>Porphyromonas gingivalis</i>        | /5Biosg/GGGGAGAGGTAAGAGGACTAAGGAGCAGAACTTATGAATAGAAAATAGTATGCA     |                                                          |
|                                              | AY689230.1  <i>Prevotella nigrescens</i>            | /5Biosg/CAACGGCCCAACGAAGCCAGCAGTCACTAGGGGTTCTGAGAGGAAG             |                                                          |
|                                              | AY689230.1  <i>Prevotella nigrescens</i>            | /5Biosg/TGTTGTGAATTTAGGTGCTCAACATTTAACTTGCAGCGCAACTGTCAAGCTT       |                                                          |
|                                              | AY689230.1  <i>Prevotella nigrescens</i>            | /5Biosg/TAATGCAAGTGTCACTCAACTTGAATCCGGTCCAGTTCGGACT                |                                                          |
|                                              | NC_001526.2  Human papillomavirus type 16           | /5Biosg/TGCAAGGCAAGTGTGCAAAAATTTAAAGAAATACGGGGTGGATTTTCAGAAAT      |                                                          |
|                                              | NC_001526.2  Human papillomavirus type 16           | /5Biosg/CAACGAAGTATCTCTCTGAAATTTAATAGCAGCACTTGCCCAACAC             |                                                          |
|                                              | NC_001526.2  Human papillomavirus type 16           | /5Biosg/CCTTGGGACCCGAAAGAACACAGACGACTTCCAGCGACCAAGAT               |                                                          |
|                                              | NC_001526.2  Human papillomavirus type 16           | /5Biosg/GGAATTTTGGTCTACAACCTCCCGAGGAGGACACTAGAAGATA                |                                                          |
